# Supplementary material for: A ZEKE photoelectron spectroscopy and ab initio study of the cis- and trans-isomers of formanilide: Characterizing the cationic amide bond ?
Source: Royal Society of Chemistry journal article supplement (doi:10.1039/b107700g), 2001-01-01
Supplement: table.doc [file table.doc]

**SUPPLEMENTARY MATERIAL**

**TABLE I: The twenty lowest frequency harmonic vibrational frequencies (in cm-1) of the S0 and S1 states of *trans*- and *cis***-formanilide obtained from CASSCF calculations.

| *trans*-FA | | | | *cis*-FA | | |
| --- | --- | --- | --- | --- | --- | --- |
| Mode | Symm. | S0 | S1 | mode | S0 | S1 |
| C1N | a'' | 36.6 | 41.2 | BN | 66.8 | 69.9 |
| BN | a'' | 158.7 | 137.6 | C1N | 128.3 | 136.2 |
| B' | a' | 211.0 | 208.4 | Bamide | 154.3 | 138.2 |
| '' | a'' | 315.2 | 294.8 |  | 294.8 | 242.9 |
| 18b | a' | 365.6 | 357.1 | amide | 420.7 | 392.9 |
| 16b | a'' | 418.1 | 384.7 | 16a | 434.4 | 281.6 |
| 16a | a'' | 435.6 | 276.8 | 18b | 476.3 | 464.4 |
| 6a | a' | 532.3 | 485.7 | 16b | 559.6 | 381.8 |
| NH | a'' | 560.7 | 585.5 | NH | 620.9 | 655.9 |
| 6b | a' | 661.7 | 582.0 | 6b | 662.8 | 586.1 |
| 4 | a'' | 691.9 | 481.0 | 6a | 700.8 | 670.4 |
| 10b | a'' | 763.2 | 557.7 | 4 | 732.9 | 495.1 |
| 12 | a' | 811.0 | 771.0 | 10b | 778.0 | 545.6 |
| 10a | a'' | 845.8 | 510.8 | 10a | 846.6 | 532.8 |
| ? | a'' | 920.1 | 610.6 | 17b | 913.0 | 627.9 |
| 9b | a' | 933.3 | 904.3 | 12 | 943.5 | 892.5 |
| 17a | a'' | 982.4 | 661.5 | 17a | 981.6 | 627.3 |
| 5 | a'' | 1010.7 | 709.5 | 5 | 1007.4 | 729.6 |
| 1 | a' | 1065.2 | 1023.7 | 1 | 1068.6 | 1021 |
| 18a | a' | 1098.8 | 978.8 | 18a | 1097.3 | 977.4 |

'' represents wagging motion of amide group and phenyl ring.NH represents the out-of-plane NH bend. Bamide represents the bend of the side arm towards the ring. Ring modes are asigned by comparison with phenol.25
